# Supplementary material for: Seizing Opportunity in Emerging Fields: How Institutional Entrepreneurs Legitimated the Professional Form of Management Consulting
Source: Atypon-hosted journal article supplement (doi:10.1287/orsc.1120.0745), 2012-04-29
Supplement: orsc.1120.0745-sm.pdf [file orsc.1120.0745-sm.pdf]

## Appendix. Primary and Secondary Archival Sources Consulted

ACME (1947) *Membership and Service* (Association of Consulting Management Engineers, New York).

ACME (1952) *Directory of Membership and Services 1951* (Association of Consulting Management Engineers, New York).

ACME (1955) *Guide to Professional Practice* (Association of Consulting Management Engineers, New York).

ACME (1957) *Common Body of Knowledge required by Professional Management Consultants* (Association of Consulting Management Engineers, New York).

ACME (1959) *Directory of Membership and Services* (Association of Consulting Management Engineers, New York).

ACME (1959) *How the Management Consulting Profession Serves Business Enterprise* (Association of Consulting Management Engineers, New York).

ACME (1959) *Personal Qualifications of Management Consultants* (Association of Consulting Management Engineers, New York).

ACME (1959) *Professional Practices in Management Consulting* (Association of Consulting Management Engineers, New York).

ACME (1966) *Professional Practices in Management Consulting* (Association of Consulting Management Engineers, New York).

Albrook RC (1969) Europe's lush market for advice—American preferred. *Fortune* (July): 128–131, 180–181.

Allen RW (1962) Management evaluates the management consultant. *Personnel Admin.* 25:32–39.

Amon RF, Clifford DK, Dixon LF Jr, Grice GL, Jacobs CE Jr, Lee DC, Leiner FC Jr, and Shirley RW (1958) *Management consulting*. Technical report, Graduate School of Business Administration, Harvard University, Cambridge, MA.

Berle AA, Means GC (1932) *The Modern Corporation and Private Property* (Macmillan, New York).

Bowman J (1984) *Booz Allen and Hamilton: Seventy Years of Client Service, 1914–1984* (Booz Allen and Hamilton, New York).

Brown, S (1957) The M.D.'s for management. *Newsweek* (October 28):85–88.

- Business Week* (1946) Profit engineers. (February 16):78–83.
- Business Week* (1951) Westinghouse: Geared for expansion. (October 27):114–122.
- Business Week* (1955) Slump or boom, they keep on growing. (September 24):136–145.
- Business Week* (1957) Business advice from the shelf. (December 7):74–80.
- Business Week* (1960) Management experts thrive on own advice. (April 23):104–118.
- Business Week* (1963) Guide to expertland. (August 24):63–66.
- Campfield WL (1960) Extending the horizons of management counseling. *Advanced Management* (January 25):7–11.
- Canback S (1998) The logic of management consulting (part one). *J. Management Consulting* 10(2):3–11.
- Canback S (1999) The logic of management consulting (part two). *J. Management Consulting* 10(3):3–12.
- Chandler AD, Jr (1962) *Strategy and Structure: Chapters in the History of the American Industrial Enterprise* (MIT Press, Cambridge, MA).
- Chandler AD, Jr (1977) *The Visible Hand: The Managerial Revolution in American Business* (Belknap Press of Harvard University Press, Cambridge, MA).
- Chandler AD, Jr (1990) *Scale and Scope: The Dynamics of Industrial Capitalism* (Belknap Press of Harvard University Press, Cambridge, MA).
- Clark T (1995) *Managing Consultants: Consultancy as the Management of Impressions* (Open University Press, Buckingham, UK).
- Clark T, Fincham R, eds. (2002) *Critical Consulting: New Perspectives on the Management Advice Industry* (Blackwell, Oxford, UK).
- Cochran TC (1972) *American Business in the Twentieth Century* (Harvard University Press, Cambridge, MA).
- Cody TG (1986) *Management Consulting: A Game Without Chips* (Kennedy and Kennedy, Fitzwilliam, NH).
- Dean J (1938) The place of management counsel in business. *Harvard Bus. Rev.* 16(4):451–465.

- Engwall L, Kipping M (2002) Introduction: Management consulting as a knowledge industry. Kipping M, Engwall L, eds. *Management Consulting* (Oxford University Press, Oxford, UK), 1–16.
- Ernst B, Kieser A (2002) In search of explanations for the consulting explosion. Sahlin-Andersson K, Engwall L, eds. *The Expansion of Management Knowledge* (Stanford University Press, Stanford, CA), 47–73.
- Forbes* (1967) The instant executives. (November 15):27–45.
- Fortune* (1944) Doctors of management. (July):142–210.
- Gordon RA, Howell JE (1959) *Higher Education for Business* (Columbia University Press, New York).
- Greiner LE, Metzger RO (1983) *Consulting to Management* (Prentice Hall, Englewood Cliffs, NJ).
- Guttman D, Willner BW (1976) *The Shadow Government* (Pantheon Books, New York).
- Guzzardi W (1965) The men who came to dinner. *Fortune* 71(2):138–141, 236–238.
- Hagedorn HJ (1955) The management consultant as transmitter of business techniques. *Explorations Entrepreneurial History* 7(3):164–173.
- Higdon H (1969) *The Business Healers* (Random House, New York).
- Hunt A (1977) *The Management Consultant* (John Wiley & Sons, New York).
- Kahn EJ, Jr (1986) *The Problem Solvers: A History of Arthur D. Little, Inc.* (Little, Brown and Company, Boston, MA).
- Kihn M (2005) *House of Lies: How Management Consultants Steal Your Watch and Then Tell You the Time* (Warner Business Books, New York).
- Kiplinger Magazine* (1947) Business doctors—And quacks. (June):39–41.
- Kipping M (1996) The U.S. influence on the evolution of management consultancies in Britain, France, and Germany since 1945. *Bus. Econom. Hist.* 25(1):112–123.
- Kipping M (1997) Consultancies, institutions and the diffusion of Taylorism in Britain, Germany and France, 1920s to 1950s. *Bus. Hist.* 39(4):67–83.
- Kipping M (1999) American management consulting companies in Western Europe, 1920 to 1990: Products, reputation, and relationships. *Bus. Hist. Rev.* 73:190–220.

Kipping M (2002) Trapped in their wave: The evolution of management consultancies. Clark T, Fincham R, eds. *Critical Consulting* (Blackwell, Oxford, UK), 28–49.

Kipping M, Engwall L, eds. (2002) *Management Consulting* (Oxford University Press, Oxford, UK).

Kipping M, Saint-Martin D (2005) Between regulation, promotion and consumption: Government and management consultancy in Britain. *Bus. Hist.* 47(3):449–465.

Kubr M (2002) *Management Consulting: A Guide to the Profession*, 4th ed. (International Labour Office, Geneva).

Lazer W, Warner AE (1965) The knowledge industry: Research consultants in perspective. Marketing and Transportation Paper 13, Graduate School of Business Administration, Bureau of Business and Economic Research, Michigan State University, East Lansing, MI.

Lemann N (1999) The kids in the conference room: How McKinsey and Co. became the next big step. *New Yorker* 18(October):209–216.

Lippitt GL (1959) Dimension's of the consultant's job. *J. Soc. Issues* 15(2):5–12.

*Management Review* (1959) Consultants: Choose with care. (July):51–52.

McKenna CD (1995) The origins of modern management consulting. *Bus. Econom. Hist.* 24: 51–58.

McKenna CD (1996) Agents of adhocracy: Management consultants and the reorganization of the executive branch, 1947–1949. *Bus. Econom. Hist.* 25:101–111.

McKenna CD (1996) Finding profits in non-profits: The influence of management consultants on the third sector. Working Paper 235, Program on Non-Profit Organizations, Yale University, New Haven, CT.

McKenna CD (1997) The American challenge: McKinsey and Company's role in the transfer of decentralization to Europe, 1957–1975. Paper presented at the 1997 Academy of Management Meeting, Boston.

McKenna CD (2006) *The World's Newest Profession* (Cambridge University Press, Cambridge, UK).

Nelson RL (1959) Merger Movements in American Industry 1895–1956 (National Bureau of Economic Research, Cambridge, MA).

*New York Times* (1968) Consultants invade non-profit field. 21(July):F17.

- O'Shea J, Madigan C (1997) *Dangerous Company: The Consulting Powerhouses and the Businesses They Save and Ruin* (Times Business, New York).
- Osborn RF (1954) GE and UNIVAC: Harnessing the high-speed computer. *Harvard Bus. Rev.* 32(4):99–107.
- Pinault L (2000) *Consulting Demons* (Harper Business, New York).
- Quittmeyer CL (1961) Management looks at consultants: A survey of company opinion and experience. *Management Rev.* (March):4–10.
- Roy WG (1997) *Socializing Capital: The Rise of the Large Industrial Corporation in America* (Princeton University Press, Princeton, NJ).
- Ruef M (2002) At the interstices of organizations: The expansion of the management consulting profession, 1933–1997.
- Sahlin-Andersson K, Engwall L, eds. *The Expansion of Management Knowledge* (Stanford University Press, Stanford, CA), 74–95.
- Ryan JR (1953) Consultant field shows big growth. *New York Times* (December 3):1.
- Schwartz WLK (1958) What to do till the doctor comes. *Management Rev.* 47(8):4–8, 65–67.
- Scott MC (1998) *The Intellect Industry: Profiting and Learning from Professional Services Firms* (John Wiley & Sons, New York).
- Shay PW (1973) *Professional Responsibilities of Management Consultants: Ethics and Professional Conduct* (Association of Consulting Management Engineers, New York).
- Smith JA (1991) *The Idea Brokers: Think Tanks and the Rise of the New Policy Elite* (Free Press, New York).
- Stryker P (1954) The ambitious consultants. *Fortune* 49(5):82–85, 182–188.
- Stryker P (1954) The relentless George S. May Co. *Fortune* (June):140–208.
- Stryker P (1955) Who is an executive? *Fortune* (December):107–109, 228–232.
- Sturdy A (1997) The dialectics of consultancy. *Critical Perspect. Accounting* 8:511–535.
- Tilles S (1961) Understanding the consultant's role. *Harvard Bus. Rev.* 39:87–99.
- Time* (1959) The company doctors. (November 23):98–100.

Tisdall P (1982) *Agents of Change: The Development and Practice of Management Consultancy* (Trafalgar Square Publishing, London).

United Nations (1993) *Management Consulting: A Survey of the Industry and Its Largest Firms* (United Nations Publications, New York).

*Wall Street Journal* (1968) Management consultants work for more schools, hospitals, government agencies. (May 16):1.

Washburn SA (1996) Challenge and renewal: A historical view of the profession. *J. Management Consulting* 9:47–53.

Wolf WB (1978) *Management and Consulting: An Introduction to James O. McKinsey* (New York State School of Industrial and Labor Relations, Ithaca, NY).
